# Supplementary material
Source: publisher site journal article supplement (https://www.dovepress.com/article/399914)
Supplement: Supplementary file 1 [file get_supplementary_file.php]

# Supplementary material

*for the paper*

High Perceived Stress and Low Self-Efficacy Are Associated With Functional Somatic Disorders:

The DanFunD Study

**TABLE A1: Association between questionnaire-defined functional somatic disorders and functional somatic syndromes, perceived stress and self-efficacy**

|                                            | Self-perceived stress  |                                     | Self-efficacy          |                                     |
|--------------------------------------------|------------------------|-------------------------------------|------------------------|-------------------------------------|
|                                            | Model 3<br>PR (95% CI) | Model 4 <sub>a</sub><br>PR (95% CI) | Model 3<br>PR (95% CI) | Model 4 <sub>b</sub><br>PR (95% CI) |
| FSD overall ( <i>n</i> = 1219)             | 1.06 (1.05-1.07)       | 1.06 (1.05-1.07)                    | 1.01 (1.00-1.02)       | 1.01 (1.00-1.02)                    |
| Single-organ FSD ( <i>n</i> = 1117)        | 1.06 (1.05-1.07)       | 1.06 (1.05-1.07)                    | 1.01 (0.99-1.02)       | 1.01 (1.00-1.03)                    |
| Cardiopulmonary subtype ( <i>n</i> = 69)   | -                      | -                                   | -                      | -                                   |
| Gastrointestinal subtype ( <i>n</i> = 271) | 1.07 (1.04-1.10)       | 1.07 (1.04-1.10)                    | 1.02 (1.00-1.05)       | 1.02 (1.00-1.05)                    |
| Musculoskeletal subtype ( <i>n</i> = 716)  | 1.06 (1.05-1.08)       | 1.06 (1.05-1.08)                    | 1.00 (0.99-1.02)       | 1.00 (0.99-1.02)                    |
| General symptoms subtype ( <i>n</i> = 261) | 1.14 (1.12-1.17)       | 1.14 (1.11-1.17)                    | 1.00 (0.98-1.03)       | 1.01 (0.99-1.03)                    |
| Multi-organ FSD ( <i>n</i> = 76)           | -                      | -                                   | -                      | -                                   |
| Irritable bowel ( <i>n</i> = 256)          | 1.07 (1.04-1.10)       | 1.07 (1.04-1.10)                    | 1.01 (0.99-1.04)       | 1.01 (0.99-1.04)                    |
| Chronic widespread pain ( <i>n</i> = 325)  | 1.08 (1.06-1.11)       | 1.09 (1.06-1.11)                    | 1.01 (0.99-1.04)       | 1.02 (1.00-1.04)                    |
| Chronic fatigue ( <i>n</i> = 658)          | 1.09 (1.08-1.11)       | 1.10 (1.08-1.11)                    | 1.00 (0.99-1.02)       | 1.01 (0.99-1.02)                    |

Model 3: Adjusted for sex, age, social status, neuroticism, and adverse life events.

Model 4<sub>a</sub>: Adjusted for sex, age, social status, neuroticism, adverse life events, and self-efficacy.

Model 4<sub>b</sub>: Adjusted for sex, age, social status, neuroticism, adverse life events, and perceived stress.

"-": Could not be estimated because of low number of cases.

Abbreviations: PR = prevalence ratio; CI = confidence interval; FSD = functional somatic disorders.

**TABLE A2: Association between clinical interview-established functional somatic disorders, self-perceived stress, and self-efficacy**

|                                            | Self-perceived stress |                      | Self-efficacy    |                      |
|--------------------------------------------|-----------------------|----------------------|------------------|----------------------|
|                                            | Model 3               | Model 4 <sub>a</sub> | Model 3          | Model 4 <sub>b</sub> |
|                                            | PR (95% CI)           | PR (95% CI)          | PR (95% CI)      | PR (95% CI)          |
| Overall FSD ( <i>n</i> = 392)              | 1.04 (1.03-1.06)      | 1.03 (1.02-1.05)     | 1.01 (0.99-1.02) | 1.01 (1.00-1.03)     |
| Single-organ FSD ( <i>n</i> = 303)         | 1.04 (1.02-1.06)      | 1.04 (1.02-1.06)     | 1.01 (0.99-1.03) | 1.01 (0.99-1.03)     |
| Cardiopulmonary subtype ( <i>n</i> = 47)   | -                     | -                    | -                | -                    |
| Gastrointestinal subtype ( <i>n</i> = 157) | 1.03 (1.00-1.06)      | 1.03 (1.00-1.06)     | 1.03 (1.00-1.06) | 1.03 (1.00-1.06)     |
| Musculoskeletal subtype ( <i>n</i> = 104)  | 1.07 (1.03-1.11)      | -                    | -                | -                    |
| General symptoms subtype ( <i>n</i> = 106) | -                     | -                    | -                | -                    |
| Multi-organ FSD ( <i>n</i> = 82)           | 1.07 (1.02-1.11)      | -                    | 1.01 (0.97-1.05) | -                    |

Model 4<sub>a</sub>: Adjusted for sex, age, social status, neuroticism, adverse life events, and self-efficacy.

Model 4<sub>b</sub>: Adjusted for sex, age, social status, neuroticism, adverse life events, and perceived stress.

"-": Could not be estimated because of low number of cases.

Abbreviations: PR = prevalence ratio; CI = confidence interval; FSD = functional somatic disorders.

**TABLE A3: Association between self-perceived stress and pure types of irritable bowel, chronic widespread pain, and chronic fatigue**

|                                                      | <b>Model 1</b>   | <b>Model 2</b>   | <b>Model 3</b>   | <b>Model 4</b>   |
|------------------------------------------------------|------------------|------------------|------------------|------------------|
|                                                      | PR (95% CI)      | PR (95% CI)      | PR (95% CI)      | PR (95% CI)      |
| Irritable bowel, pure type ( <i>n</i> = 143)         | 1.07 (1.05-1.10) | 1.04 (1.00-1.07) | 1.04 (1.00-1.08) | 1.04 (1.00-1.08) |
| Chronic widespread pain, pure type ( <i>n</i> = 176) | 1.06 (1.04-1.09) | 1.06 (1.03-1.09) | 1.06 (1.03-1.10) | 1.06 (1.03-1.10) |
| Chronic fatigue, pure type ( <i>n</i> = 464)         | 1.11 (1.10-1.12) | 1.10 (1.08-1.12) | 1.10 (1.08-1.12) | 1.10 (1.08-1.12) |

Model 1: Adjusted for sex, age, and social status.

Model 2: Adjusted for sex, age, social status, and neuroticism.

Model 3: Adjusted for sex, age, social status, neuroticism, and adverse life events.

Model 4: Adjusted for sex, age, social status, neuroticism, adverse life events, and self-efficacy.

Abbreviations: PR = prevalence ratio; CI = confidence interval.

**TABLE A4: Association between self-efficacy and pure types of irritable bowel, chronic widespread pain, and chronic fatigue**

|                                                      | <b>Model 1</b>   | <b>Model 2</b>   | <b>Model 3</b>   | <b>Model 4</b>   |
|------------------------------------------------------|------------------|------------------|------------------|------------------|
|                                                      | PR (95% CI)      | PR (95% CI)      | PR (95% CI)      | PR (95% CI)      |
| Irritable bowel, pure type ( <i>n</i> = 143)         | 0.96 (0.93-0.98) | 1.00 (0.97-1.03) | 0.99 (0.96-1.03) | 0.99 (0.96-1.03) |
| Chronic widespread pain, pure type ( <i>n</i> = 176) | 0.99 (0.97-1.01) | 1.01 (0.99-1.04) | 1.02 (0.99-1.05) | 1.02 (0.99-1.05) |
| Chronic fatigue, pure type ( <i>n</i> = 464)         | 0.95 (0.93-0.96) | 1.00 (0.99-1.01) | 1.00 (0.99-1.02) | 1.01 (0.99-1.02) |

Model 1: Adjusted for sex, age, and social status.

Model 2: Adjusted for sex, age, social status, and neuroticism.

Model 3: Adjusted for sex, age, social status, neuroticism, and adverse life events.

Model 4: Adjusted for sex, age, social status, neuroticism, adverse life events, and perceived stress.

Abbreviations: PR = prevalence ratio; CI = confidence interval.

**TABLE A5: Perceived stress and self-efficacy in individuals with FSD only and differences to other disease groups**

|                                                                  | Questionnaire-based          |                              | Interview-based              |                              |
|------------------------------------------------------------------|------------------------------|------------------------------|------------------------------|------------------------------|
|                                                                  | Perceived stress             | Self-efficacy                | Perceived stress             | Self-efficacy                |
| FSD only; mean, 90% CI<br>( <i>Qn</i> = 1155, <i>In</i> = 319)   | Ref.<br>14.37 (14.08; 14.65) | Ref.<br>19.75 (19.49; 20.02) | Ref.<br>16.52 (15.90; 17.14) | Ref.<br>19.50 (18.96; 20.04) |
| Healthy; diff. (90% CI)<br>( <i>Qn</i> = 6779, <i>In</i> = 907)  | -4.60 (-4.90; -4.29)         | 1.75 (1.46; 2.04)            | -5.33 (-6.05; -4.61)         | 1.93 (1.30; 2.55)            |
| PhyDis; diff. (90% CI)<br>( <i>Qn</i> = 1145, <i>In</i> = 239)   | -4.59 (-5.00; -4.19)         | 1.08 (0.70; 1.46)            | -4.35 (-5.29; -3.40)         | 0.88 (0.06; 1.70)            |
| FSD+PhyDis; diff. (90% CI)<br>( <i>Qn</i> = 354, <i>In</i> = 83) | 0.40 (-0.19; 0.99)           | -1.04 (-1.59; -0.49)         | -0.53 (-1.89; 0.83)          | -0.94 (-2.12; 0.25)          |

Abbreviations: Diff. = difference; CI = confidence interval; Qn = number of questionnaire-based cases; In = number of interview-based cases; FSD = functional somatic disorder, operationalised as Bodily Distress Syndrome; PhyDis = physical disease only; FSD+PhyDis = functional somatic disorder and physical disease; Ref. = reference.

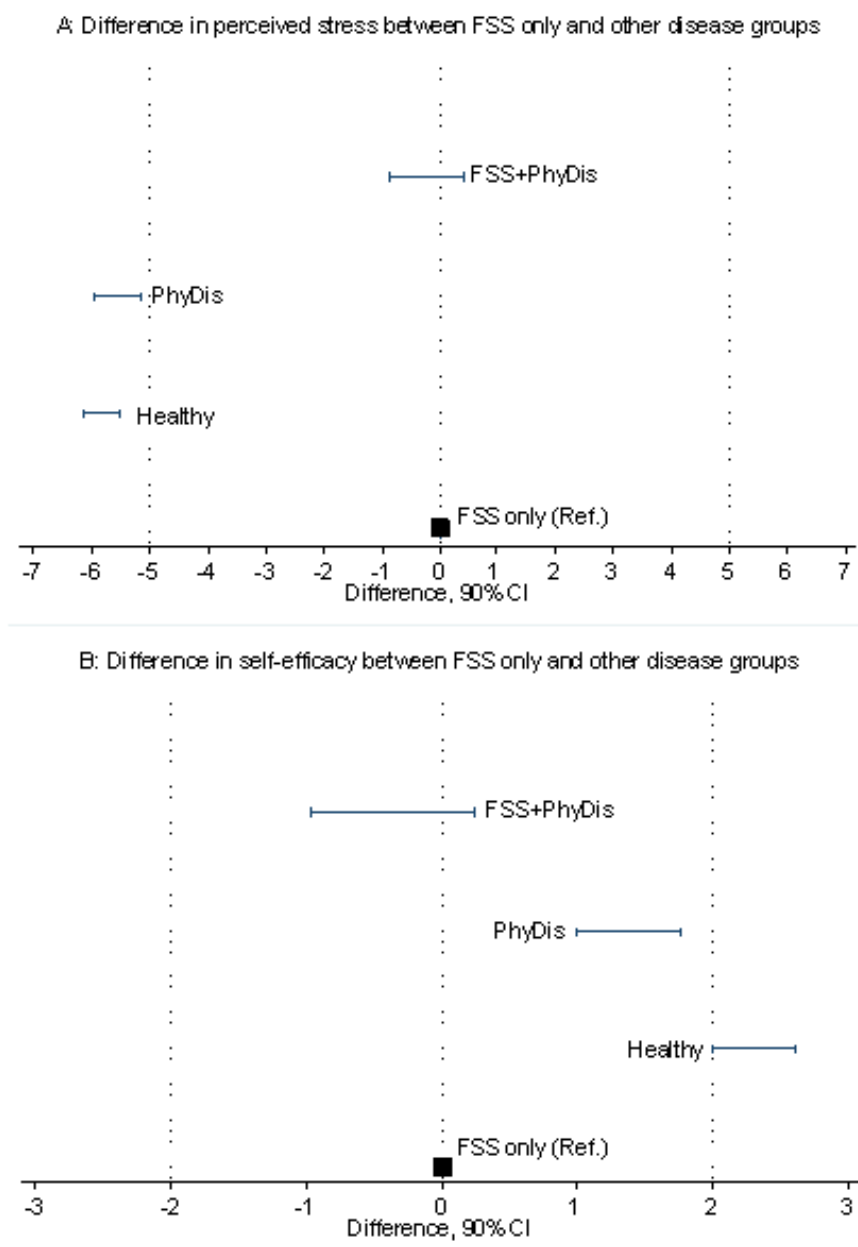

**Figure A1:** FSS = functional somatic syndrome (irritable bowel, chronic widespread pain, chronic fatigue); PhyDis = physical disease only; FSD+PhyDis = functional somatic syndrome and physical disease; Ref. = reference. All cases are questionnaire-defined.

**TABLE A6: Perceived stress and self-efficacy in individuals with FSS only and differences to other disease groups**

|                                                 | Questionnaire-based          |                              |
|-------------------------------------------------|------------------------------|------------------------------|
|                                                 | Perceived stress             | Self-efficacy                |
| FSS only; mean, 90% CI<br>( <i>n</i> = 999)     | Ref.<br>15.49 (15.19; 15.79) | Ref.<br>19.24 (18.96; 19.52) |
| Healthy; diff. (90% CI)<br>( <i>n</i> = 6780)   | -5.83 (-6.15; -5.51)         | 2.31 (2.00; 2.61)            |
| PhyDis; diff. (90% CI)<br>( <i>n</i> = 1198)    | -5.55 (-5.95; -5.14)         | 1.38 (1.00; 1.77)            |
| FSS+PhyDis; diff. (90% CI)<br>( <i>n</i> = 277) | -0.23 (-0.88; 0.41)          | -0.36 (-0.96; 0.25)          |

Abbreviations: Diff. = difference; CI = confidence interval; FSS = functional somatic syndrome (irritable bowel, chronic widespread pain, chronic fatigue); PhyDis = physical disease only; FSS+PhyDis = functional somatic syndrome and physical disease; Rf. = reference.
